# Supplementary material for: Post-Flowering Nitrate Uptake in Wheat Is Controlled by N Status at Flowering, with a Putative Major Role of Root Nitrate Transporter NRT2.1
Source: PubMed Central journal article supplement (PMC4370649; doi:10.1371/journal.pone.0120291), 2015-03-23
Supplement: pone.0120291.s008.pdf [file pone.0120291.s008.pdf]

| <b>Primer pair name</b> | <b>Used for</b>                                   | <b>Reference / Genbank accession number / Unigene contig</b> | <b>Primer</b> | <b>Sequence</b>            |
|-------------------------|---------------------------------------------------|--------------------------------------------------------------|---------------|----------------------------|
| <b>TaNR</b>             | Nitrate reductase                                 | Boisson <i>et al.</i> , 2005                                 | Forward       | CGACTGCACCGCCTTCCTCA       |
|                         |                                                   |                                                              | Reverse       | CGCCGGCGACCTTGGTG          |
| <b>TaNiR</b>            | Nitrite reductase                                 | Boisson <i>et al.</i> , 2005                                 | Forward       | CCCTACACCAACCTCCTCTCCTCC   |
|                         |                                                   |                                                              | Reverse       | GTCGTTGATGTGCGGGTGCTC      |
| <b>TaFd-GOGAT</b>       | Ferredoxin-dependent glutamate synthase           | Boisson <i>et al.</i> , 2005                                 | Forward       | TGGTGCCACCCAGCGAAGA        |
|                         |                                                   |                                                              | Reverse       | AGCTCGTTTCCAGAAGATGCCTTG   |
| <b>TaNADH-GOGAT</b>     | NADH glutamate synthase                           | Boisson <i>et al.</i> , 2005                                 | Forward       | CAGTGGTCCTGCTGGTTTTGGCT    |
|                         |                                                   |                                                              | Reverse       | TGCATTGTTCTCAGAACGGAGACG   |
| <b>TaGS2</b>            | Glutamine synthetase 2                            | DQ124212.1                                                   | Forward       | CATACTACTGCGCCGTAGGATCAGAC |
|                         |                                                   |                                                              | Reverse       | GGCATGACCTCCCCGTTTGT       |
| <b>TaNRT1</b>           | Nitrate transporter NRT1                          | AY587264                                                     | Forward       | GAGCTGAGGAATCACATGGCAAAC   |
|                         |                                                   |                                                              | Reverse       | CATGAAGGCTGGCTCTGGGGT      |
| <b>TaNRT2.1</b>         | Nitrate transporter NRT2.1                        | AF332214.1                                                   | Forward       | GCCGCTTGTCTTCCACGCA        |
|                         |                                                   |                                                              | Reverse       | GTCCTTGCCATGTCTCCCTTCT     |
| <b>Ta54280</b>          | Translation initiation factor Su11 family protein | Ta.54280                                                     | Forward       | TCTGCTGTAATGGTACTGTAGTC    |
|                         |                                                   |                                                              | Reverse       | TCCGTGAATCTTGATGCTCTC      |
| <b>Ta54948</b>          | Rab GTPase homolog (Rab7 subfamily)               | Ta.54948                                                     | Forward       | GAACGAGCCAGAGGAAGAAC       |
|                         |                                                   |                                                              | Reverse       | AAATACGGGTCCACAAGTCAC      |
