# Supplementary material for: Post-Flowering Nitrate Uptake in Wheat Is Controlled by N Status at Flowering, with a Putative Major Role of Root Nitrate Transporter NRT2.1
Source: PubMed Central journal article supplement (PMC4370649; doi:10.1371/journal.pone.0120291), 2015-03-23
Supplement: pone.0120291.s009.pdf [file pone.0120291.s009.pdf]

| <b>NO<sub>3</sub><sup>-</sup> treatment</b> | <b>Roots [NO<sub>3</sub><sup>-</sup>] (μmol g<sup>-1</sup>)<br/>±SE</b> | <b>Stems [NO<sub>3</sub><sup>-</sup>] (μmol g<sup>-1</sup>)<br/>±SE</b> | <b>Flag leaves [NO<sub>3</sub><sup>-</sup>] (μmol g<sup>-1</sup>) ±SE</b> |
|---------------------------------------------|-------------------------------------------------------------------------|-------------------------------------------------------------------------|---------------------------------------------------------------------------|
| <b>N4</b>                                   | 29.09 ± 4.22 <i>b</i>                                                   | 36.16 ± 2.49 <i>b</i>                                                   | 78.78 ± 17.15 <i>a</i>                                                    |
| <b>N10</b>                                  | 77.78 ± 7.41 <i>a</i>                                                   | 138.58 ± 11.42 <i>a</i>                                                 | 63.37 ± 4.87 <i>a</i>                                                     |
