# Supplementary material for: Post-Flowering Nitrate Uptake in Wheat Is Controlled by N Status at Flowering, with a Putative Major Role of Root Nitrate Transporter NRT2.1
Source: PubMed Central journal article supplement (PMC4370649; doi:10.1371/journal.pone.0120291), 2015-03-23
Supplement: pone.0120291.s010.pdf [file pone.0120291.s010.pdf]

---

| <b>N treatment</b> | <b>Grain number (per m<sup>-2</sup>)<br/>±SE</b> | <b>Thousand Kernel Weight<br/>(g) ±SE</b> |
|--------------------|--------------------------------------------------|-------------------------------------------|
| <b>N1</b>          | 22955 ± 3443 <i>a</i>                            | 26,24 ± 0,77 <i>a</i>                     |
| <b>N4</b>          | 30759 ± 3108 <i>a</i>                            | 29,91 ± 1,45 <i>ab</i>                    |
| <b>N7</b>          | 50253 ± 2407 <i>b</i>                            | 31,75 ± 1,08 <i>b</i>                     |
| <b>N10</b>         | 58808 ± 4836 <i>b</i>                            | 28,74 ± 0,64 <i>ab</i>                    |

---
